# Supplementary material for: Intestinal Microbiota in Healthy U.S. Young Children and Adults—A High Throughput Microarray Analysis
Source: PubMed Central journal article supplement (PMC3662718; doi:10.1371/journal.pone.0064315), 2013-05-23

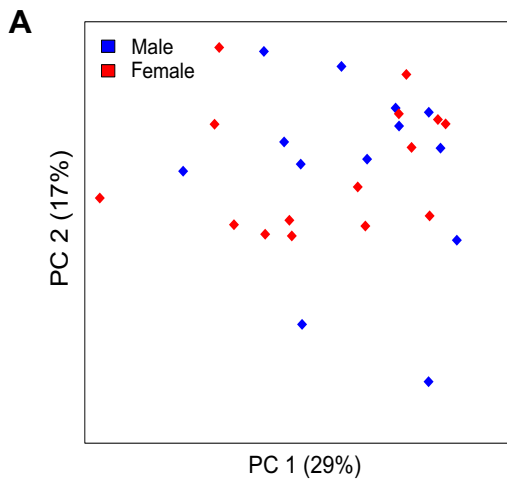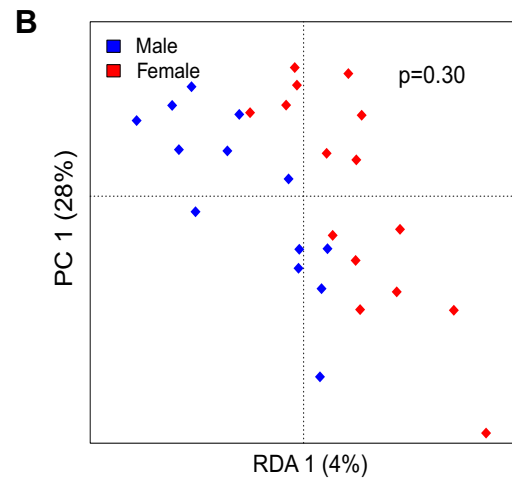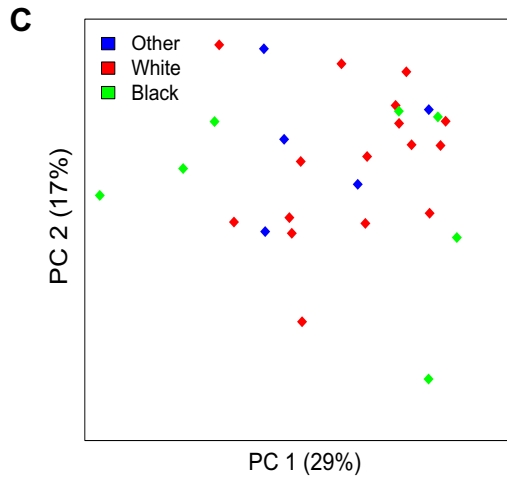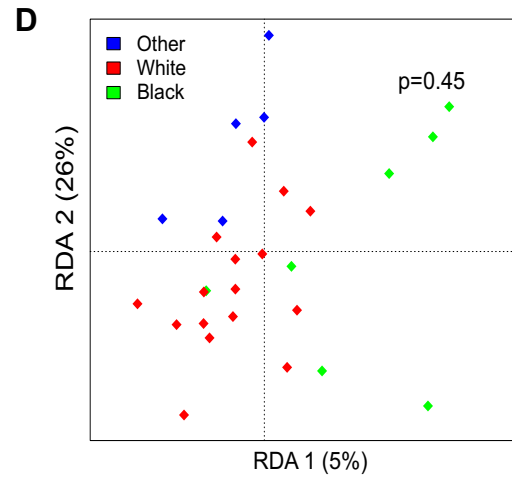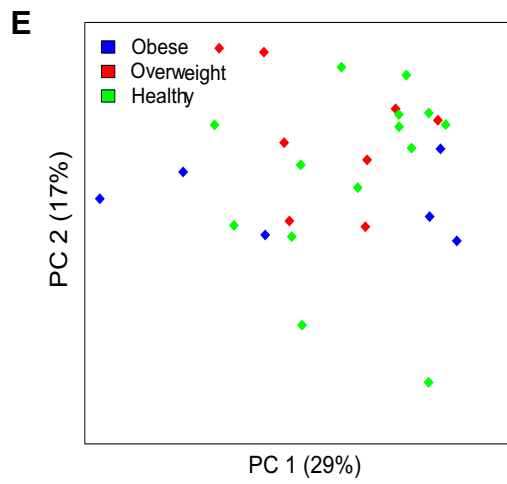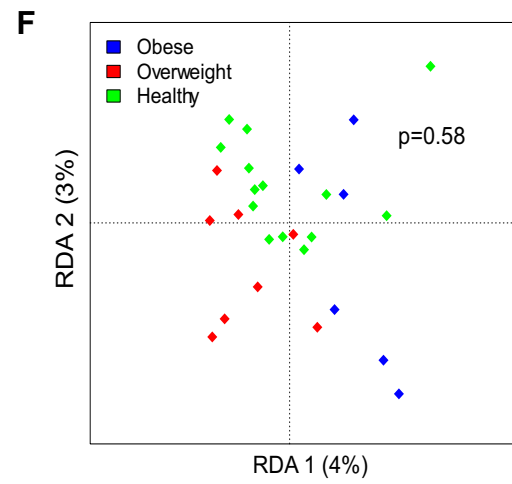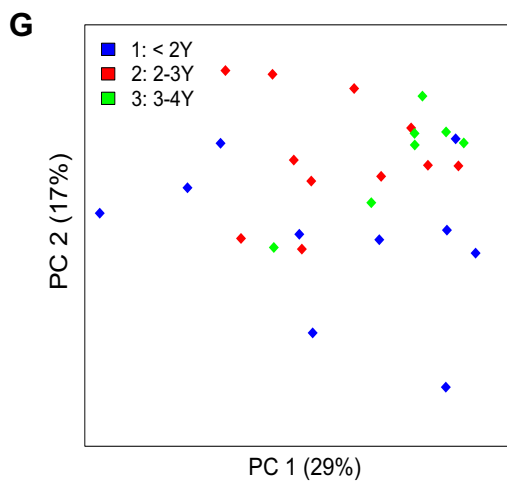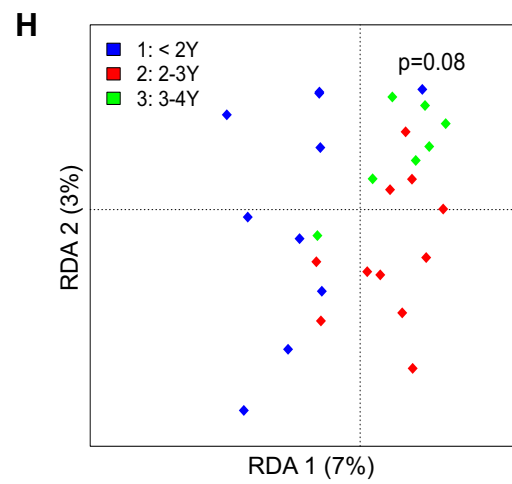

Supplement: pone.0064315.s002.pdf [file pone.0064315.s002.pdf]
