# Supplementary material for: Intestinal Microbiota in Healthy U.S. Young Children and Adults—A High Throughput Microarray Analysis
Source: PLoS One. 2013 May 23;8(5):e64315. doi: 10.1371/journal.pone.0064315 (PMC3662718; doi:10.1371/journal.pone.0064315)
Supplement: Table S1 — Demographics Information of Study Subjects (XLSX) [file pone.0064315.s007.xlsx]

## Sheet: BG.txt
Ringel-Kulka et al.
Table S1. Demographics information of study subjects
Sample ID	BMI category	Class	Gender	Race	Age (years)	Age group
107	Healthy	Adult	Female	Asian	27	4
297	Obese	Adult	Female	Black	28	4
278	Obese	Adult	Female	Black	33	4
109	Healthy	Adult	Female	White	25	4
110	Healthy	Adult	Female	White	54	4
106	Healthy	Adult	Female	White	25	4
108	Healthy	Adult	Female	White	21	4
296	Healthy	Adult	Female	White	28	4
295	Healthy	Adult	Female	White	60	4
292	Healthy	Adult	Female	White	23	4
293	Healthy	Adult	Female	White	37	4
294	Healthy	Adult	Female	White	37	4
266	Obese	Adult	Female	White	58	4
96	Overweight	Adult	Female	White	52	4
97	Healthy	Adult	Female	White	22	4
98	Healthy	Adult	Male	White	21	4
99	Healthy	Adult	Female	White	54	4
100	Obese	Adult	Male	White	28	4
101	Obese	Adult	Female	White	24	4
102	Healthy	Adult	Male	White	52	4
103	Healthy	Adult	Female	White	22	4
104	Healthy	Adult	Female	White	25	4
105	Healthy	Adult	Male	White	42	4
K1A	Healthy	Child	Male	White	1.5	1
K2A	Overweight	Child	Male	White	2.91667	2
K3A	Obese	Child	Female	Black	1.66667	1
K4A	Obese	Child	Female	White	1.66667	1
K5A	Overweight	Child	Female	Black	2	1
K6A	Overweight	Child	Male	Not recorded	2.91667	2
K7A	Healthy	Child	Female	Black	1.5	1
K8A	Healthy	Child	Female	Black	3.5	3
K9A	Healthy	Child	Male	White	2.91667	2
K10A	Overweight	Child	Male	Hispanic	2.83333	2
K11A	Overweight	Child	Male	White	2.66667	2
K12A	Overweight	Child	Female	White	1.5	1
K13A	Overweight	Child	Female	White	2	1
K14A	Healthy	Child	Male	Black	1.16667	1
K15A	Healthy	Child	Female	Pacific Islander	3.91667	3
K16A	Healthy	Child	Female	White	3.91667	3
K17A	Healthy	Child	Female	White	2.5	2
K18A	Healthy	Child	Female	White	2.58333	2
K19A	Healthy	Child	Male	Hispanic	4	3
K20A	Obese	Child	Male	Black	1.91667	1
K21A	Obese	Child	Female	Hispanic	4	3
K22A	Healthy	Child	Female	White	2.08333	2
K23A	Overweight	Child	Female	White	2.83333	2
K25A	Healthy	Child	Female	White	4	3
K26A	Healthy	Child	Male	White	2.91667	2
K27A	Obese	Child	Male	Black	1.58333	1
K29A	Healthy	Child	Male	White	3.91667	3
K30A	Obese	Child	Male	White	2.08333	2
Race, other than Black and White were considered in the third group "Other" in the data analysis
Age group:	1: subjects' age ≤ 2 years
	2: subjects' age between 2-3 years (include 3 years)
	3: subjects' age between 3-4 years (include 4 years)
	4: Adults
